# Supplementary material
Source: PubMed Central journal article supplement (PMC4677877)
Supplement: supp_pp.15.00359_PP2015-00359R2_Supplemental_Materialtbls.pdf [file supp_pp.15.00359_PP2015-00359R2_Supplemental_Materialtbls.pdf]

**Supplementary Table SI.** Purification of the anthocyanin degradation enzyme (ADE) from Litchi fruit pericarp

| Step                                                | Total volume (mL) | Total activity (nmol min <sup>-1</sup> ) | Total protein (μg) | Specific activity (nmol min <sup>-1</sup> μg <sup>-1</sup> protein) | Recovery rate (%) | Purification fold |
|-----------------------------------------------------|-------------------|------------------------------------------|--------------------|---------------------------------------------------------------------|-------------------|-------------------|
| Raw extract                                         | 790               | 1858.045                                 | 166023.9           | 0.011                                                               | 100               | 1                 |
| 30% (NH <sub>4</sub> ) <sub>2</sub> SO <sub>4</sub> | 815               | 1293.701                                 | 53871.5            | 0.024                                                               | 69.63             | 2.2               |
| 70% (NH <sub>4</sub> ) <sub>2</sub> SO <sub>4</sub> | 32                | 71.539                                   | 3233.9             | 0.022                                                               | 3.85              | 2.0               |
| DEAE-Sepharose                                      | 20                | 48.540                                   | 1322.0             | 0.037                                                               | 2.61              | 3.3               |
| Sephadex G-200                                      | 2.5               | 5.901                                    | 7.1                | 0.827                                                               | 0.32              | 73.9              |

**Supplementary Table SII.** Comparison of inhibitor responses for ADE activity from Litchi fruit pericarp

| Effector                | Concentration (mM) | Inhibition (%) |
|-------------------------|--------------------|----------------|
| <i>p</i> -Coumaric acid | 1                  | 18.89          |
| Cinnamic acid           | 1                  | 6.1            |
| Ferulic acid            | 1                  | 25.29          |
| PVP                     | 5                  | 0              |
| SDS                     | 5                  | 91.31          |
| CTAB                    | 5                  | 67.4           |

**Supplemental Table SIII.** Primers used for full length cDNA fragment cloning of ADE/LAC gene

| Name                     | Sequence (5' to 3')                            |
|--------------------------|------------------------------------------------|
| ADE/LAC-F3               | CCACTACGAYTTYGTNGTNAA                          |
| ADE/LAC-R1               | GGGTCCAATYTTTRCAYTGNGT                         |
| ADE/LAC-F2               | CAACCACAACCTCACAGTGG                           |
| ADE/LAC-R2               | CAACTTATCGCCACCCAGAT                           |
| ADE/LAC<br>(3'RACE-F2)   | CAACCACAACCTCACAGTGG                           |
| 3CDS                     | AAGCAGTGGTATCAACGCAGAGTAC (T) <sub>30</sub> VN |
| ADE/LAC<br>(5'RACE-R2)   | GTCGTATGAAGCCGAATGGT                           |
| 5'RACE<br>(outer primer) | CATGGCTACATGCTGACAGCCTA                        |
| 5'RACE<br>(inner primer) | CGCGGATCCACAGCCTACTGATGATCAGTCGATG             |

**Supplemental Table SIV.** Primers used for construction of the vector for transient expression ADE/LAC and ADE/LAC-YFP protein in *N. benthamiana* (Nb) leaves

| Name                     | Sequence (5' to 3')             |
|--------------------------|---------------------------------|
| pBI101-35S-ADE/LAC-F     | ACGGATCCATGGGTTTGGTGTTCGAGGTTC  |
| pBI101-35S-ADE/LAC-R     | TGGAGCTCTCAAGAGCTGGAACAACACTAGG |
| pBI101-35S-ADE/LAC-YFP-F | TTGTTCGACATGGGTTTGGTGTTCGAGGTTC |
| pBI101-35S-ADE/LAC-YFP-R | TGGAGCTCTCAAGAGCTGGAACAACACTAGG |

**Supplemental Table SV.** Primers used for quantitative real-time PCR analysis

| Name      | Sequence (5' to 3')         |
|-----------|-----------------------------|
| ACTIN-F   | ACCGTATGAGCAAGGAAATCACTG    |
| ACTIN-R   | TCGTCGTACTIONCACCCCTTGAAATC |
| ADE/LAC-F | GGACTAATCTTGGGAATG          |
| ADE/LAC-R | TAAATCTGATGGCAACCC          |
| PPO-F     | GGAGCAAGAAGGAGAAGGAA        |
| PPO-R     | GGAACCAAAGTTACCACCAC        |
